# Supplementary material for: The Genetic Architecture of Noise-Induced Hearing Loss: Evidence for a Gene-by-Environment Interaction
Source: PubMed Central journal article supplement (PMC5068943; doi:10.1534/g3.116.032516), 2016-08-11
Supplement: supp_g3.116.032516_FigureS1.pdf [file supp_g3.116.032516_FigureS1.pdf]

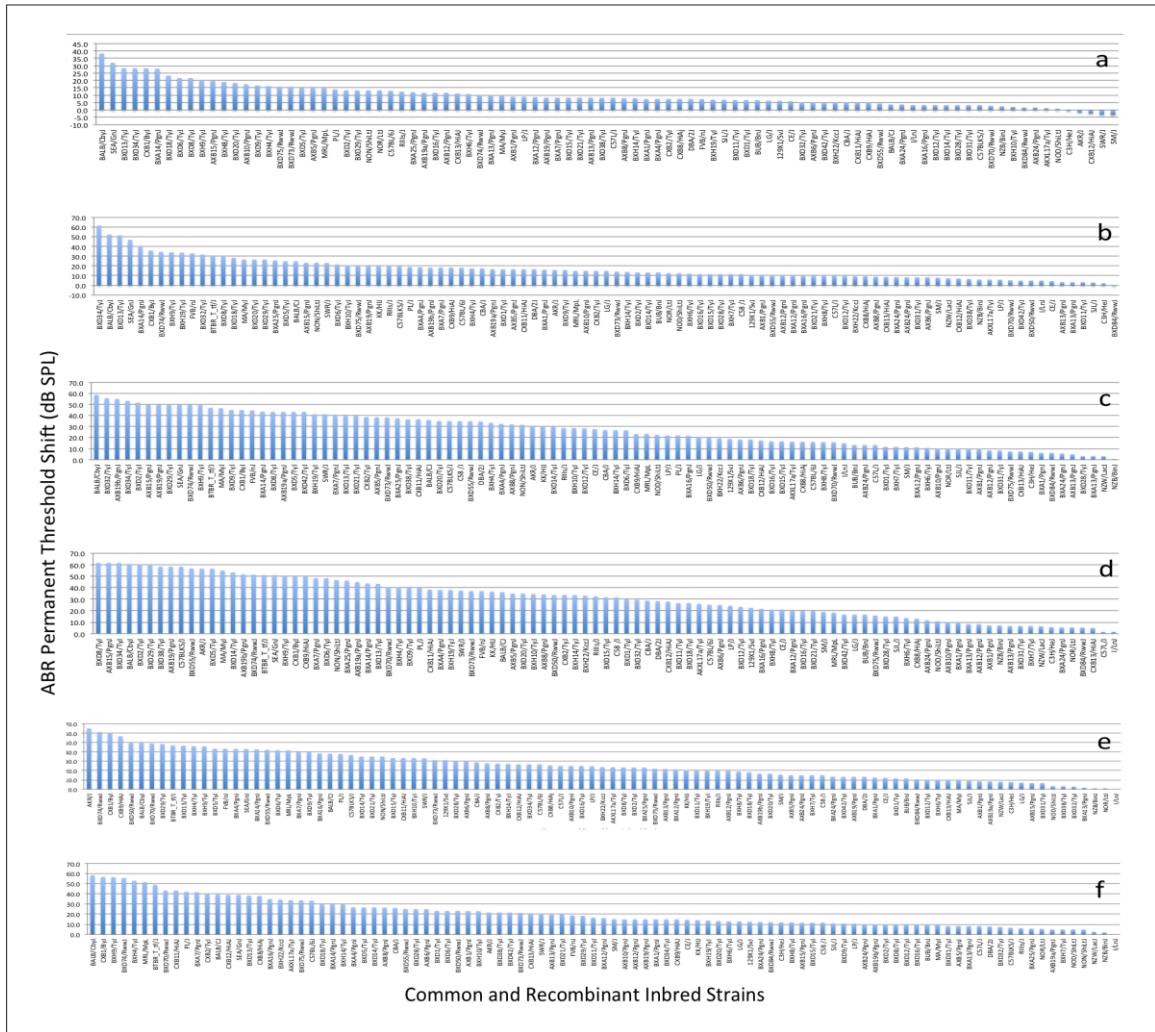

**Figure S1.** ABR permanent threshold shift at 4kHz (a), 8 kHz (b), 12 kHz (c), 16 kHz (d), 24 kHz (e) and 32 kHz (f) tone burst in 100 HMDP inbred strains.
