# Supplementary material for: The Genetic Architecture of Noise-Induced Hearing Loss: Evidence for a Gene-by-Environment Interaction
Source: PubMed Central journal article supplement (PMC5068943; doi:10.1534/g3.116.032516), 2016-08-11
Supplement: supp_g3.116.032516_FigureS2.pdf [file supp_g3.116.032516_FigureS2.pdf]

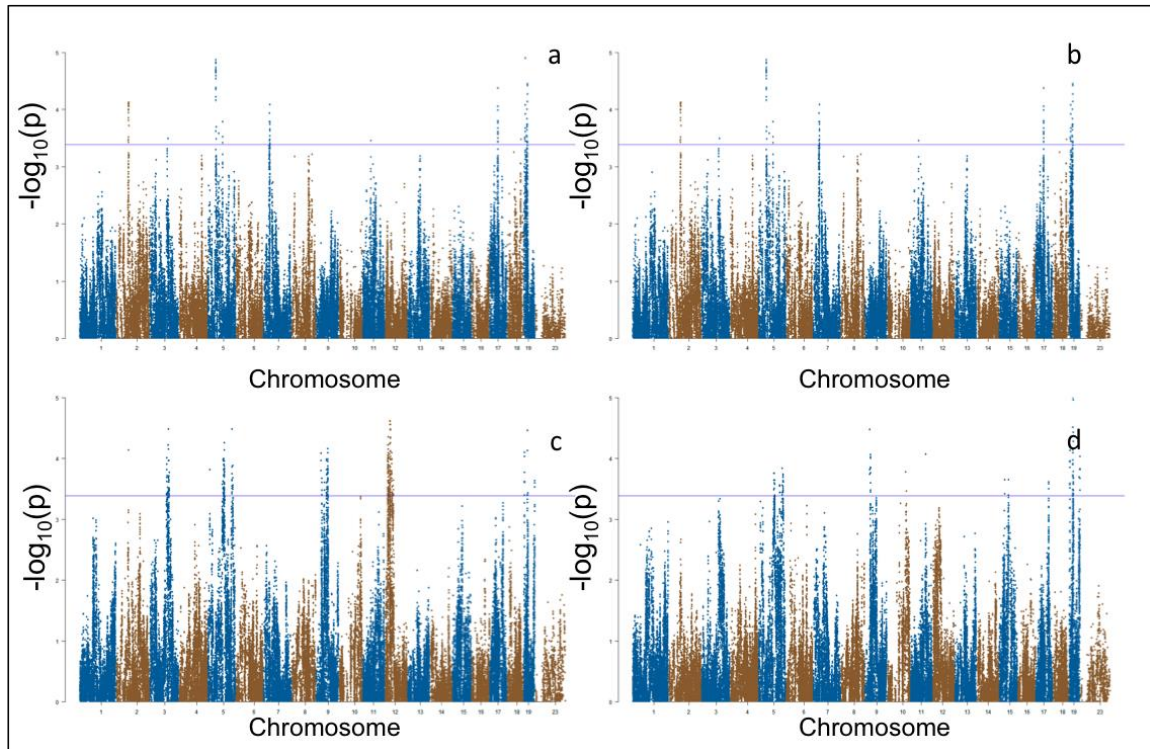

**Figure S2. GWAS results for ABR permanent threshold shifts in the HMDP at 4kHz (a), 8 kHz (b), 12 kHz (c) and 16 kHz (d) tone burst in 100 HMDP inbred strains.** Manhattan plot showing the association (-log<sub>10</sub>) p-values (-logP) in 100 HMDP inbred mouse strains. The analysis was performed using over 200,000 SNPs with a minor allele frequency > 5%. Each chromosome is plotted on the x-axis in alternating brown and blue colors.
