# Supplementary material for: The Genetic Architecture of Noise-Induced Hearing Loss: Evidence for a Gene-by-Environment Interaction
Source: PubMed Central journal article supplement (PMC5068943; doi:10.1534/g3.116.032516), 2016-08-11
Supplement: supp_g3.116.032516_TableS1.pdf [file supp_g3.116.032516_TableS1.pdf]

**Table S1. Top 50 cochlear genes correlated with ABR hearing thresholds after noise exposure.**

| Rank | Gene Symbol          | Correlation (R) | P value  |
|------|----------------------|-----------------|----------|
| 1    | <i>Ceacam16</i>      | 0.63314363      | 2.34E-06 |
| 2    | <i>Nfs1</i>          | -0.606689066    | 7.84E-06 |
| 3    | <i>Enpp6</i>         | 0.601075866     | 1.00E-05 |
| 4    | <i>Tpr</i>           | 0.608379381     | 1.18E-05 |
| 5    | <i>Mageb3</i>        | -0.581123217    | 2.29E-05 |
| 6    | <i>Dock11</i>        | 0.580664094     | 2.33E-05 |
| 7    | <i>Rb1</i>           | 0.580468193     | 2.35E-05 |
| 8    | <i>Dnase1</i>        | -0.576202531    | 2.78E-05 |
| 9    | <i>Zfp711</i>        | -0.57432478     | 3.00E-05 |
| 10   | <i>Vrk2</i>          | -0.574223342    | 3.01E-05 |
| 11   | <i>Tyk2</i>          | -0.573094643    | 3.15E-05 |
| 12   | <i>Anapc10</i>       | -0.569789802    | 3.58E-05 |
| 13   | <i>Aldh1a7</i>       | 0.569568567     | 3.61E-05 |
| 14   | <i>Nr5a2</i>         | 0.564941894     | 4.31E-05 |
| 15   | <i>E130012A19Rik</i> | -0.56392403     | 4.48E-05 |
| 16   | <i>Rad51l3</i>       | -0.560016846    | 5.19E-05 |
| 17   | <i>Npas3</i>         | -0.558473078    | 5.50E-05 |
| 18   | <i>2010011120Rik</i> | 0.557262619     | 5.75E-05 |
| 19   | <i>Sult1d1</i>       | 0.555832289     | 6.07E-05 |
| 20   | <i>Abca6</i>         | 0.577906441     | 6.13E-05 |
| 21   | <i>D14Ertd500e</i>   | -0.555050103    | 6.24E-05 |
| 22   | <i>Prf1</i>          | 0.551855207     | 7.02E-05 |
| 23   | <i>Tm2d3</i>         | 0.550464614     | 7.39E-05 |
| 24   | <i>Atp7a</i>         | 0.549495335     | 7.65E-05 |

|    |                      |              |             |
|----|----------------------|--------------|-------------|
| 25 | <i>Dnase1</i>        | -0.548605529 | 7.90E-05    |
| 26 | <i>Ptprc</i>         | 0.547742066  | 8.15E-05    |
| 27 | <i>Sirpb1</i>        | 0.547181265  | 8.32E-05    |
| 28 | <i>Ltbp4</i>         | -0.544590872 | 9.13E-05    |
| 29 | <i>A830006N08Rik</i> | 0.544562809  | 9.13E-05    |
| 30 | <i>Anapc10</i>       | -0.540561991 | 0.000105271 |
| 31 | <i>2010011120Rik</i> | 0.540231267  | 0.000106504 |
| 32 | <i>Steap2</i>        | -0.539824993 | 0.000108037 |
| 33 | <i>Sirpb1</i>        | 0.538938237  | 0.000111453 |
| 34 | <i>6430550H21Rik</i> | -0.538760647 | 0.000112148 |
| 35 | <i>Txn12</i>         | -0.560551502 | 0.000112983 |
| 36 | <i>Smek1</i>         | 0.536736012  | 0.000120364 |
| 37 | <i>Ptprg</i>         | -0.536699938 | 0.000120515 |
| 38 | <i>Ly86</i>          | 0.536049688  | 0.000123271 |
| 39 | <i>Samd14</i>        | -0.535227006 | 0.00012684  |
| 40 | <i>Ccr3</i>          | -0.534355832 | 0.000130721 |
| 41 | <i>Abl1</i>          | -0.533296993 | 0.000135583 |
| 42 | <i>Chrna2</i>        | 0.533049843  | 0.000136742 |
| 43 | <i>Prpf38a</i>       | 0.532729091  | 0.000138258 |
| 44 | <i>Cnfn</i>          | 0.532459001  | 0.000139547 |
| 45 | <i>Lyz2</i>          | -0.532216621 | 0.000140713 |
| 46 | <i>4930522H14Rik</i> | 0.531367649  | 0.000144868 |
| 47 | <i>Slc6a1</i>        | -0.530914922 | 0.000147128 |
| 48 | <i>Klhl7</i>         | 0.529266988  | 0.000155631 |
| 49 | <i>Olfr652</i>       | 0.529229655  | 0.000155828 |
| 50 | <i>Abl1</i>          | -0.528913993 | 0.000157509 |
