# Supplementary material for: The Genetic Architecture of Noise-Induced Hearing Loss: Evidence for a Gene-by-Environment Interaction
Source: PubMed Central journal article supplement (PMC5068943; doi:10.1534/g3.116.032516), 2016-08-11
Supplement: supp_g3.116.032516_TableS2.pdf [file supp_g3.116.032516_TableS2.pdf]

**Table S2.** Top functional annotation cluster for the genes correlated with hearing after noise exposure (Enrichment Score: 6.51).

| Original Database | Enriched terms                                              | Count | P-value | Fold change | Bonferroni |
|-------------------|-------------------------------------------------------------|-------|---------|-------------|------------|
| KEGG_PATHWAY      | Olfactory transduction                                      | 16    | 8.8E-14 | 8.4E0       | 1.1E-11    |
| GOTERM_MF_FAT     | Olfactory receptor activity                                 | 18    | 3.8E-12 | 5.8E0       | 1.9E-9     |
| INTERPRO          | Olfactory receptor                                          | 18    | 7.4E-12 | 5.6E0       | 5.4E-9     |
| GOTERM_BP_FAT     | Sensory perception of chemical stimulus                     | 18    | 9.5e-12 | 5.5E0       | 1.7E-8     |
| GOTERM_BP_FAT     | Sensory perception of smell                                 | 18    | 9.5E-12 | 5.5E0       | 1.7E-8     |
| PIR_SUPERFAMILY   | PIRSF003152:G protein-coupled olfactory receptor, class II  | 13    | 1.3E-8  | 5.4E0       | 2.8E-6     |
| GOTERM_BP_FAT     | Sensory perception                                          | 24    | 4.2E-7  | 2.9E0       | 7.3E-4     |
| GOTERM_BP_FAT     | Neurological system process                                 | 36    | 3.0E-6  | 2.2E0       | 5.1E-3     |
| GOTERM_BP_FAT     | Cognition                                                   | 28    | 6.9E-6  | 2.4E0       | 1.2E-2     |
| INTERPRO          | GPCR, rhodopsin-like superfamily                            | 27    | 1.3E-5  | 2.4E0       | 9.4E-3     |
| INTERPRO          | 7TM GPCR, rhodopsin-like                                    | 26    | 5.6E-5  | 2.2E0       | 4.0E-2     |
| GOTERM_BP_FAT     | <u>G-protein coupled receptor protein signaling pathway</u> | 29    | 2.0E-4  | 2.0E0       | 2.9E-1     |
| PIR_SUPERFAMILY   | PIRSF800006:rhodopsin-like G protein-coupled receptors      | 21    | 2.1E-4  | 2.3E0       | 4.7E-2     |
| GOTERM_BP_FAT     | <u>cell surface receptor linked signal transduction</u>     | 42    | 5.8E-4  | 1.6E0       | 6.4E-1     |
| SP_PIR_KEYWORDS   | G-protein coupled receptor                                  | 24    | 9.3E-4  | 2.0E0       | 2.5E-1     |
| SP_PIR_KEYWORDS   | Transducer                                                  | 26    | 1.9E-3  | 1.8E0       | 4.4E-1     |
| SP_PIR_KEYWORDS   | Receptor                                                    | 47    | 3.3E-3  | 1.5E0       | 6.5E-1     |
