# Supplementary material for: The Genetic Architecture of Noise-Induced Hearing Loss: Evidence for a Gene-by-Environment Interaction
Source: PubMed Central journal article supplement (PMC5068943; doi:10.1534/g3.116.032516), 2016-08-11
Supplement: supp_g3.116.032516_TableS3.pdf [file supp_g3.116.032516_TableS3.pdf]

**Table S3.** Top functional annotation clusters for the 1,363 genes regulated by the top 300 *trans*-eQTL hotspots.

| Original database                                  | Enriched terms                | Count | P_Value  | Fold Change | Bonferroni |
|----------------------------------------------------|-------------------------------|-------|----------|-------------|------------|
| <b>Annotation Cluster 1 Enrichment Score: 6.95</b> |                               |       |          |             |            |
| SP_PIR_KEYWORDS                                    | mitochondrion                 | 105   | 1.30E-09 | 1.80        | 5.90E-07   |
| GOTERM_CC_FAT                                      | mitochondrion                 | 156   | 1.60E-09 | 1.60        | 7.50E-07   |
| SP_PIR_KEYWORDS                                    | transit peptide               | 64    | 5.20E-07 | 1.90        | 2.40E-04   |
| GOTERM_CC_FAT                                      | mitochondrial part            | 69    | 3.10E-06 | 1.80        | 1.50E-03   |
| UP_SEQ_FEATURE                                     | transit peptide:Mitochondrion | 63    | 5.40E-06 | 1.80        | 1.50E-02   |
| <b>Annotation Cluster 2 Enrichment Score: 4.12</b> |                               |       |          |             |            |
| GOTERM_CC_FAT                                      | mitochondrial part            | 69    | 3.10E-06 | 1.80        | 1.50E-03   |
| GOTERM_CC_FAT                                      | organelle envelope            | 68    | 1.70E-05 | 1.70        | 8.10E-03   |
| GOTERM_CC_FAT                                      | envelope                      | 68    | 1.90E-05 | 1.70        | 9.20E-03   |
| GOTERM_CC_FAT                                      | mitochondrial membrane        | 48    | 1.60E-04 | 1.80        | 7.30E-02   |
| GOTERM_CC_FAT                                      | organelle inner membrane      | 42    | 2.20E-04 | 1.80        | 1.00E-01   |
| GOTERM_CC_FAT                                      | mitochondrial inner membrane  | 40    | 2.90E-04 | 1.80        | 1.30E-01   |
| GOTERM_CC_FAT                                      | mitochondrial envelope        | 49    | 3.40E-04 | 1.70        | 1.50E-01   |
| GOTERM_CC_FAT                                      | organelle membrane            | 87    | 3.40E-04 | 1.50        | 1.50E-01   |
| <b>Annotation Cluster 3 Enrichment Score: 3.64</b> |                               |       |          |             |            |
| GOTERM_CC_FAT                                      | mitochondrial part            | 69    | 3.10E-06 | 1.80        | 1.50E-03   |
| GOTERM_CC_FAT                                      | mitochondrial lumen           | 24    | 2.00E-03 | 2.00        | 6.20E-01   |
| GOTERM_CC_FAT                                      | mitochondrial matrix          | 24    | 2.00E-03 | 2.00        | 6.20E-01   |
| <b>Annotation Cluster 4 Enrichment Score: 3.28</b> |                               |       |          |             |            |
| GOTERM_BP_FAT                                      | intracellular transport       | 58    | 6.60E-06 | 1.90        | 1.90E-02   |

|                 |                                       |     |          |      |          |
|-----------------|---------------------------------------|-----|----------|------|----------|
| SP_PIR_KEYWORDS | protein transport                     | 60  | 1.30E-05 | 1.80 | 5.70E-03 |
| GOTERM_BP_FAT   | protein localization                  | 81  | 3.20E-04 | 1.50 | 6.00E-01 |
| GOTERM_BP_FAT   | establishment of protein localization | 72  | 4.00E-04 | 1.50 | 6.90E-01 |
| GOTERM_BP_FAT   | protein transport                     | 71  | 5.30E-04 | 1.50 | 7.80E-01 |
| SP_PIR_KEYWORDS | transport                             | 145 | 1.50E-03 | 1.30 | 4.90E-01 |
| GOTERM_BP_FAT   | cellular protein localization         | 35  | 6.00E-03 | 1.60 | 1.00E+00 |
| GOTERM_BP_FAT   | cellular macromolecule localization   | 35  | 6.60E-03 | 1.60 | 1.00E+00 |
| GOTERM_BP_FAT   | intracellular protein transport       | 32  | 1.00E-02 | 1.60 | 1.00E+00 |
